# Supplementary material
Source: PubMed Central journal article supplement (PMC5712622)
Supplement: 10.1074_M117.812677_jbc.M117.812677-2.pdf [file 10.1074_M117.812677_jbc.M117.812677-2.pdf]

## SUPPLEMENTARY FIGURES AND TABLES

### Supplementary Tables

**Table S1.**

GO-terms (biological process: BP-FAT, cellular component: CC-FAT, molecular function: MF-FAT) and KEGG pathways enriched in POS-stimulated phosphoproteome over POS-stimulated proteome. Table shows the percent of enrichment (%) and significance of each particular observation (Fisher's exact test,  $P < 0.05$ ).

| Gene Ontology | Enriched term                                   | %     | significance |
|---------------|-------------------------------------------------|-------|--------------|
| BP-FAT        | single-organism organelle organization          | 3.275 | 2.61E-05     |
| BP-FAT        | cytoskeleton organization                       | 2.924 | 1.08E-04     |
| BP-FAT        | cell-cell adhesion                              | 3.509 | 3.35E-04     |
| BP-FAT        | microtubule cytoskeleton organization           | 0.936 | 3.45E-03     |
| BP-FAT        | actin cytoskeleton organization                 | 2.105 | 6.30E-03     |
| CC-FAT        | cell-cell junction                              | 3.392 | 2.44E-05     |
| CC-FAT        | actin cytoskeleton                              | 2.690 | 3.29E-05     |
| CC-FAT        | cell-cell adherens junction                     | 3.158 | 3.97E-05     |
| CC-FAT        | cell junction                                   | 4.795 | 4.81E-05     |
| CC-FAT        | adherens junction                               | 4.561 | 5.10E-05     |
| MF-FAT        | cytoskeletal protein binding                    | 2.924 | 1.65E-05     |
| MF-FAT        | cadherin binding                                | 3.041 | 4.46E-05     |
| MF-FAT        | protein binding involved in cell-cell adhesion  | 3.041 | 4.46E-05     |
| MF-FAT        | protein binding involved in cell adhesion       | 3.041 | 4.46E-05     |
| MF-FAT        | cadherin binding involved in cell-cell adhesion | 3.041 | 4.46E-05     |
| KEGG PATHWAY  | MAPK signalling pathway                         | 0.702 | 5.86E-03     |
| KEGG PATHWAY  | Focal adhesion                                  | 1.053 | 2.04E-02     |

**Table S2.**

List of proteins and phosphorylation sites which exhibited significantly altered abundance/phosphorylation level in response to phagocytosis in both ARPE-19 and native RPE analysis.

| <b>Proteomic analysis</b> | <b>Phosphoproteomic analysis</b> |                             |
|---------------------------|----------------------------------|-----------------------------|
| <b>Protein</b>            | <b>Protein</b>                   | <b>Phosphorylation site</b> |
| ACTC1                     | ABI1                             | Ser184                      |
| ACTN4                     | AHNAK                            | Ser135                      |
| DECR1                     | AHNAK                            | Ser216                      |
| HNRNPA2B1                 | AHNAK                            | Ser1452                     |
| HNRNPH1                   | HNRNPU                           | Ser271                      |
| LIMA1                     | MAP1B                            | Ser1501                     |
| LMNA                      | MAPK1 (ERK2)                     | Tyr187                      |
| MYH14                     | MYLK                             | Ser365                      |
| NAMPT                     | NUFIP2                           | Ser629                      |
| PLEC                      | PDLIM4                           | Ser112                      |
| RPL30                     | PGM5                             | Ser122                      |
| SRI                       | PRKAR1A                          | Ser83                       |
| TPM1                      | RANBP2                           | Ser1160                     |
| VCL                       | RPTOR                            | Ser863                      |
| YWHAG                     | THRAP3                           | Ser682                      |
|                           | TRA2B                            | Thr201                      |

## Supplementary Figures

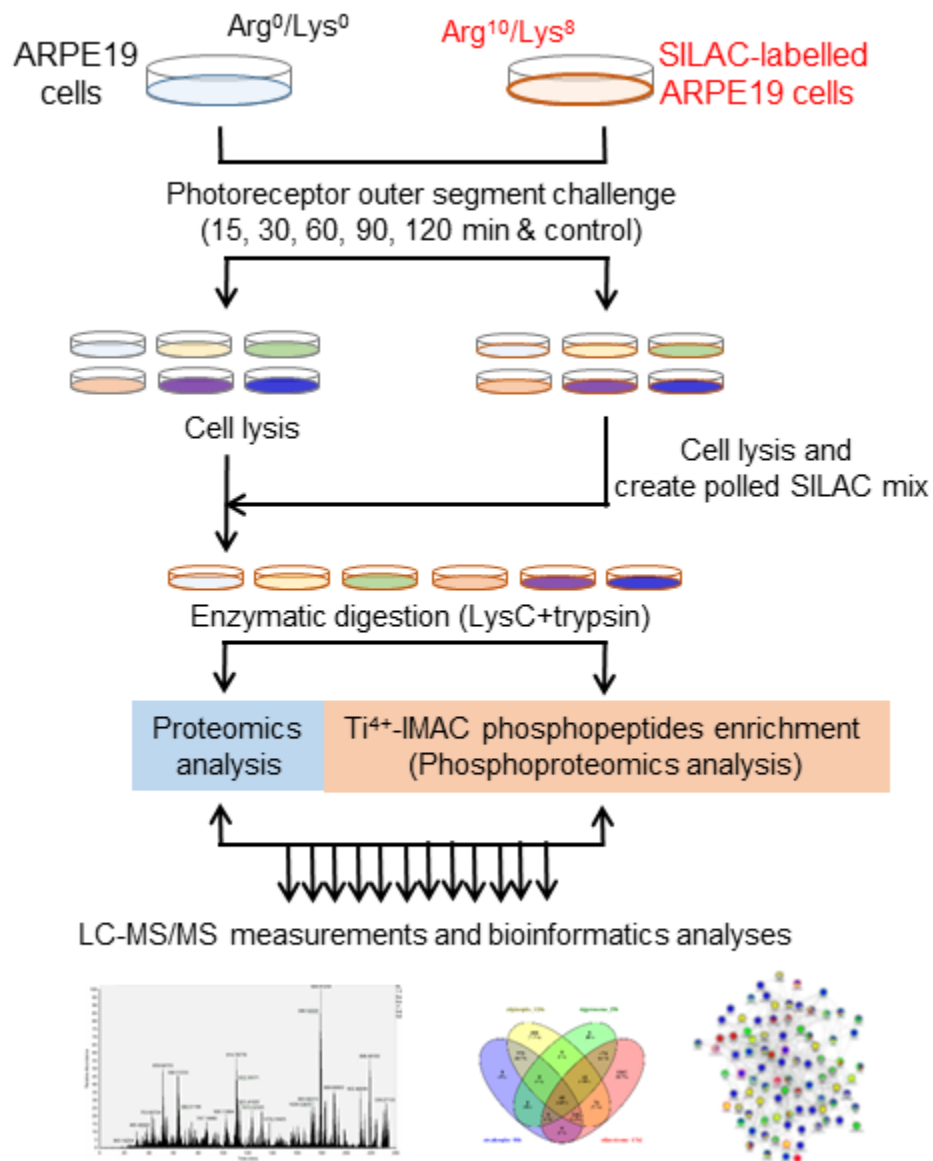

**Figure S1.** Schematic overview of the SILAC-based quantification of the ARPE-19 proteome and phosphoproteome under POS challenge for different time periods.

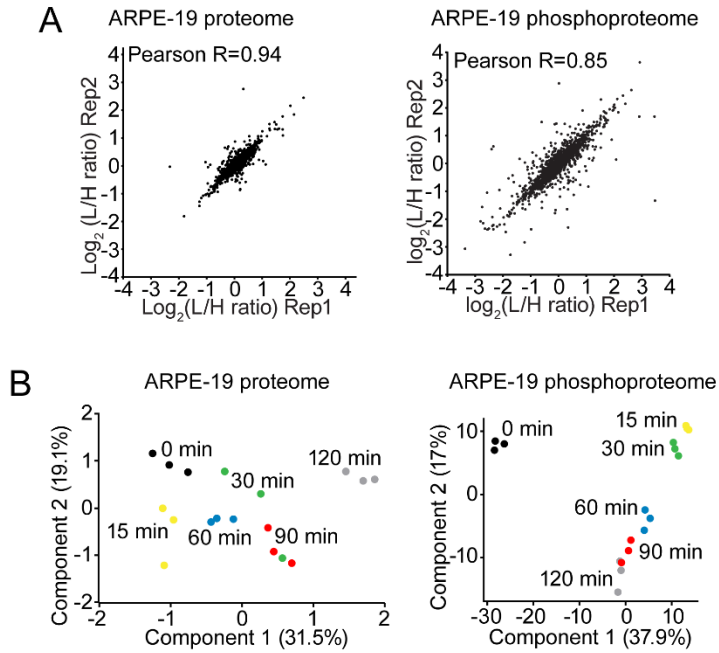

**Figure S2.** (A) Representative scatter plots showing the correlation between proteomic/phosphoproteomic measurements of biological replicates. (B) Principal component analysis (PCA) of significantly altered proteome (265 proteins) and phosphoproteome (1597 phosphosites).

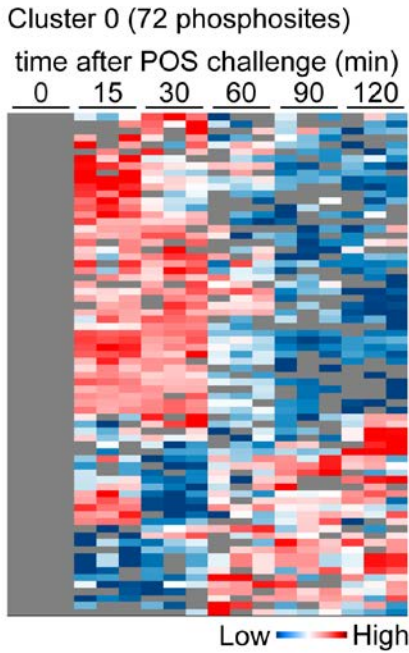

**Figure S3.** Heatmap showing relative phosphorylation levels of 72 sites with undetectable phosphorylation under control conditions (0 min). Phosphorylation levels are represented with color-coded boxes (blue: low, red: high, gray: not detected). Quantification for 3 biological replicates is presented for each time point.

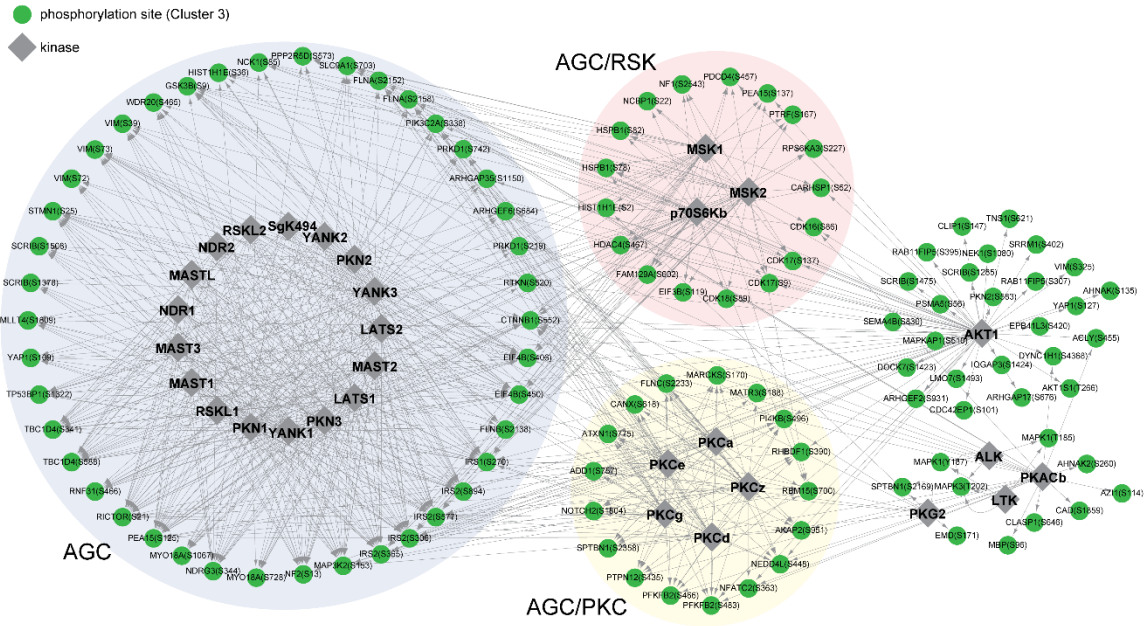

**Figure S4.** Protein interaction networks of potential site-specific kinase-substrate relations (ssKSRs) between the POS-stimulated phosphoproteome and enriched putative protein kinases. Information of each POS-stimulated dependent phosphorylation event was denoted by a different color code from each hierarchical cluster in Figure 2F.

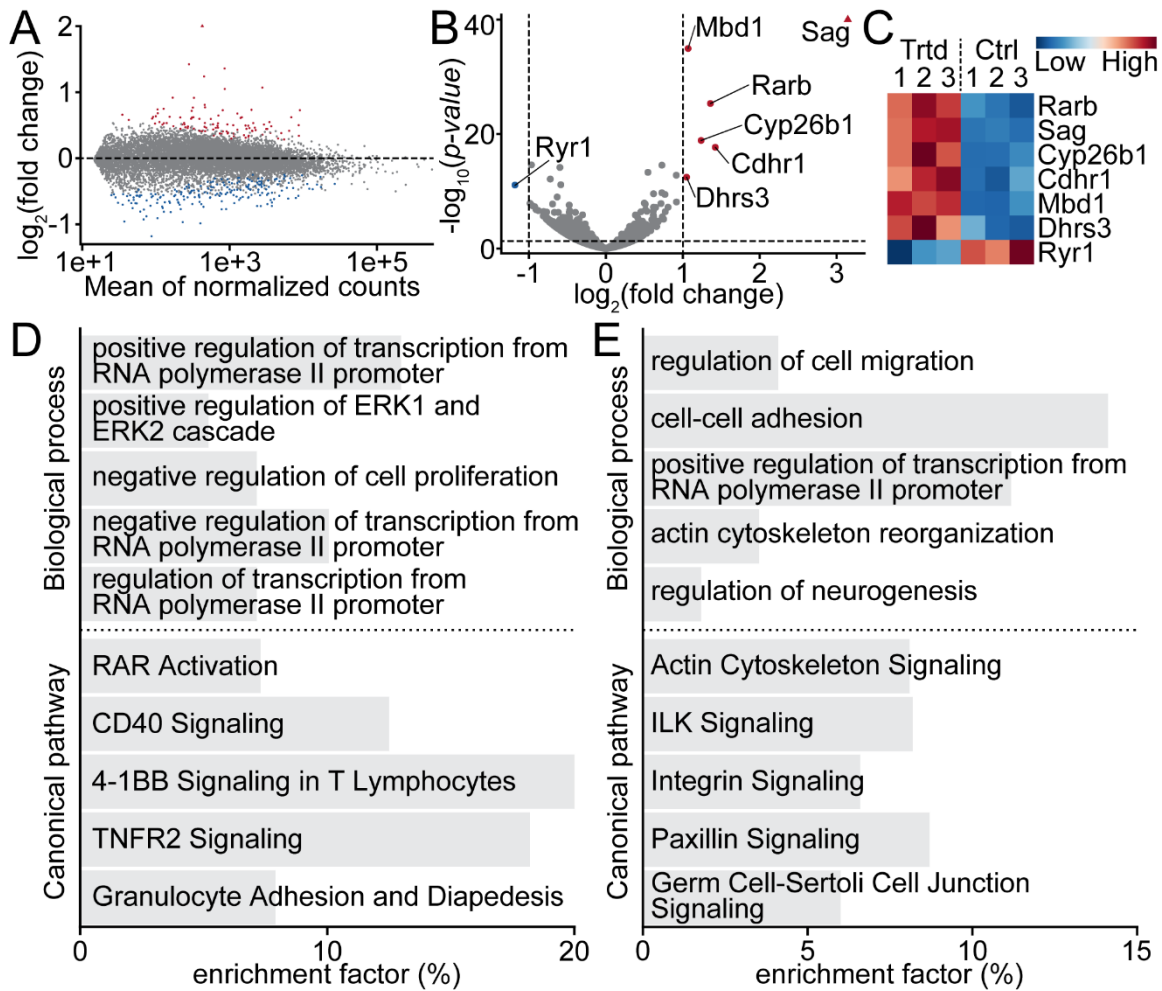

**Figure S5. Transcriptomic and phosphoproteomic analysis of cultured primary RPE cells under POS stimulation**

(A) RNA-seq libraries were generated for both POS-challenged and control primary RPE cells grown in culture ( $n=3$ ). MA plot showing fold changes of individual genes in response to POS challenge. A total of 309 significantly altered genes (adjusted  $P$ -value  $<0.05$ ) are marked in red (upregulated) or blue (downregulated). Significantly altered genes constituted less than 2.5% of the 12556 genes provided for the analysis after our initial pre-filtration steps. (B) Volcano plot showing rare genes with markedly (over 2-fold) increased or decreased expression under POS stimulation. (C) Heat map revealing normalized expression levels of seven markedly altered genes in three biological replicates of each condition. (D) Top five biological process GO-terms and enriched

canonical pathways characterizing the significantly altered transcriptome from cultured RPE cells. (E) Top five biological process GO-terms and enriched canonical pathways characterizing the subset of cultured RPE phosphoproteome homologous to the significantly altered phosphoproteome of ARPE-19.
